# Supplementary material for: Water Quality Assessment and Environmental Impact of Heavy Metals in the Red Sea Coastal Seawater of Yanbu, Saudi Arabia
Source: MDPI journal article supplement (doi:10.3390/w15010201), 2023-01-03
Supplement: s1 [file s1]

Supplementary Table S1. The coordinates of the sampling sites, pH, electrical conductivity (EC, mS/cm), salinity (Sal, ppt) and the HM analyses (µg/L), and the pollution indices of the 30 surface seawater samples from the area.

| S.N.      | Lat      | Long     | As  | Cd   | Co   | Cr  | Cu  | Fe  | Hg    | Mn   | Pb   | Ni   | Zn  | Sb   | Al  | HPI  | C <sub>d</sub> |
|-----------|----------|----------|-----|------|------|-----|-----|-----|-------|------|------|------|-----|------|-----|------|----------------|
| <b>1</b>  | 24 15 52 | 37 43 03 | 3.1 | 0.22 | 0.09 | 1.1 | 1.9 | 1.4 | 0.026 | 0.37 | 0.21 | 3.2  | 3.2 | 0.21 | 1.6 | 5.98 | 1.26           |
| <b>2</b>  | 24 15 43 | 37 43 03 | 2.5 | 0.35 | 0.12 | 0.9 | 2.5 | 0.9 | 0.032 | 0.28 | 0.18 | 4.1  | 2.5 | 0.38 | 1.3 | 6.10 | 1.39           |
| <b>3</b>  | 24 14 31 | 37 45 41 | 4.3 | 0.23 | 0.07 | 0.6 | 3   | 1.2 | 0.035 | 0.35 | 0.25 | 3.2  | 3   | 0.25 | 0.9 | 5.46 | 1.50           |
| <b>4</b>  | 24 12 58 | 37 46 31 | 2.7 | 0.25 | 0.09 | 0.4 | 2.7 | 1.5 | 0.018 | 0.42 | 0.22 | 1.6  | 1.7 | 0.37 | 1.1 | 4.51 | 1.21           |
| <b>5</b>  | 24 11 36 | 37 48 34 | 3.2 | 0.32 | 0.08 | 0.6 | 3.8 | 1.5 | 0.044 | 0.34 | 0.33 | 2.7  | 0.9 | 0.16 | 1.3 | 4.89 | 1.52           |
| <b>6</b>  | 24 09 49 | 37 50 30 | 4.5 | 0.28 | 0.11 | 0.7 | 3.4 | 0.7 | 0.092 | 0.28 | 0.12 | 3.1  | 2.3 | 0.15 | 0.9 | 5.04 | 1.61           |
| <b>7</b>  | 24 09 12 | 37 52 48 | 5.2 | 0.34 | 0.1  | 0.8 | 1.7 | 0.8 | 0.053 | 0.31 | 0.43 | 4.2  | 0.7 | 0.29 | 1   | 8.52 | 1.66           |
| <b>8</b>  | 24 08 50 | 37 55 31 | 3   | 0.31 | 0.07 | 1.1 | 1.5 | 1   | 0.095 | 0.42 | 0.09 | 1.8  | 1.1 | 0.32 | 1.3 | 6.30 | 1.06           |
| <b>9</b>  | 24 09 37 | 37 55 51 | 2.8 | 0.26 | 0.08 | 0.6 | 1.5 | 1.2 | 0.029 | 0.25 | 0.11 | 2.32 | 2.8 | 0.25 | 1.2 | 7.90 | 1.04           |
| <b>10</b> | 24 10 30 | 37 55 28 | 4.6 | 0.32 | 0.14 | 1.2 | 3.5 | 0.8 | 0.024 | 0.29 | 0.14 | 2.5  | 0.9 | 0.37 | 1   | 7.90 | 1.61           |
| <b>11</b> | 24 12 08 | 37 55 10 | 2.9 | 0.26 | 0.15 | 1   | 3.2 | 0.4 | 0.088 | 0.36 | 0.31 | 1.6  | 2.3 | 0.16 | 0.9 | 7.90 | 1.55           |
| <b>12</b> | 24 12 29 | 37 56 19 | 6.6 | 0.3  | 0.22 | 0.9 | 2.4 | 1.2 | 0.024 | 0.32 | 0.28 | 1.3  | 0.9 | 0.24 | 1.4 | 7.90 | 1.85           |
| <b>13</b> | 24 12 01 | 37 57 15 | 3.8 | 0.25 | 0.2  | 0.7 | 2.8 | 0.9 | 0.035 | 0.38 | 0.2  | 5.6  | 1.1 | 0.33 | 1   | 7.90 | 1.74           |
| <b>14</b> | 24 10 39 | 37 56 01 | 8.1 | 0.26 | 0.18 | 0.8 | 3.2 | 1.1 | 0.055 | 0.35 | 0.35 | 4.7  | 0.8 | 0.18 | 1.2 | 7.90 | 2.24           |
| <b>15</b> | 24 09 42 | 37 57 14 | 5.5 | 0.24 | 0.1  | 0.6 | 2.5 | 1.8 | 0.032 | 0.28 | 0.31 | 5.1  | 2.9 | 0.15 | 0.9 | 7.54 | 1.75           |
| <b>16</b> | 24 07 17 | 37 58 12 | 6.8 | 0.22 | 0.13 | 0.1 | 1.8 | 0.5 | 0.072 | 0.24 | 0.21 | 5.6  | 0.3 | 0.22 | 0.7 | 7.90 | 1.76           |
| <b>17</b> | 24 04 24 | 38 02 10 | 3.5 | 0.36 | 0.14 | 0.9 | 1.2 | 1.3 | 0.065 | 0.31 | 0.41 | 5.5  | 0.3 | 0.24 | 1.3 | 7.90 | 1.57           |
| <b>18</b> | 24 04 23 | 38 03 06 | 4.4 | 0.34 | 0.25 | 0.9 | 1.8 | 0.8 | 0.048 | 0.28 | 0.4  | 6    | 1.5 | 0.22 | 1.1 | 7.90 | 1.97           |
| <b>19</b> | 24 04 01 | 38 04 48 | 2.9 | 0.36 | 0.18 | 0.2 | 2.2 | 0.8 | 0.072 | 0.33 | 0.39 | 6.1  | 1.8 | 0.26 | 0.9 | 7.59 | 1.76           |
| <b>20</b> | 24 03 17 | 38 05 47 | 3.6 | 0.45 | 0.2  | 0.7 | 2.3 | 1.7 | 0.068 | 0.35 | 0.3  | 5.9  | 1.5 | 0.21 | 1.2 | 9.01 | 1.84           |

|           |          |          |     |      |      |     |     |     |       |      |      |     |     |      |     |      |      |
|-----------|----------|----------|-----|------|------|-----|-----|-----|-------|------|------|-----|-----|------|-----|------|------|
| <b>21</b> | 24 02 24 | 38 06 57 | 4.6 | 0.42 | 0.22 | 0.9 | 3   | 0.4 | 0.06  | 0.31 | 0.28 | 6.1 | 2.3 | 0.18 | 1.4 | 9.44 | 2.07 |
| <b>22</b> | 24 01 46 | 38 08 04 | 3.5 | 0.4  | 0.18 | 0.5 | 1.5 | 0.6 | 0.084 | 0.21 | 0.25 | 6   | 2.9 | 0.16 | 0.9 | 8.35 | 1.68 |
| <b>23</b> | 24 00 46 | 38 09 33 | 3.2 | 0.38 | 0.14 | 0.3 | 3.8 | 0.6 | 0.086 | 0.41 | 0.3  | 5.8 | 1.1 | 0.22 | 1.3 | 7.76 | 1.84 |
| <b>24</b> | 23 59 37 | 38 10 22 | 3   | 0.32 | 0.26 | 0.4 | 1.5 | 0.9 | 0.076 | 0.4  | 0.4  | 6.8 | 2.8 | 0.12 | 1   | 7.60 | 1.90 |
| <b>25</b> | 23 59 35 | 38 11 14 | 5.2 | 0.3  | 0.24 | 0.8 | 2.3 | 1   | 0.072 | 0.39 | 0.32 | 6.6 | 1   | 0.23 | 1.3 | 8.67 | 2.07 |
| <b>26</b> | 23 42 29 | 38 28 30 | 3.9 | 0.32 | 0.18 | 0.9 | 2.9 | 0.8 | 0.058 | 0.3  | 0.36 | 6   | 2.7 | 0.35 | 1.1 | 7.84 | 1.94 |
| <b>27</b> | 23 42 08 | 38 28 40 | 6.7 | 0.36 | 0.09 | 0.4 | 1.1 | 0.7 | 0.066 | 0.28 | 0.24 | 5.6 | 1.1 | 0.15 | 1.2 | 9.59 | 1.67 |
| <b>28</b> | 23 41 33 | 38 28 48 | 5.6 | 0.34 | 0.08 | 0.6 | 2.8 | 1.2 | 0.08  | 0.25 | 0.2  | 4.6 | 0.8 | 0.32 | 1.4 | 8.58 | 1.69 |
| <b>29</b> | 23 41 03 | 38 29 01 | 4   | 0.22 | 0.1  | 1.1 | 2.9 | 1   | 0.085 | 0.36 | 0.34 | 5.2 | 2.1 | 0.18 | 1   | 6.47 | 1.71 |
| <b>30</b> | 23 40 33 | 38 29 11 | 5.2 | 0.28 | 0.12 | 1   | 2.7 | 0.8 | 0.064 | 0.42 | 0.36 | 3.9 | 0.7 | 0.28 | 1.2 | 7.90 | 1.76 |
